# Supplementary material for: Detection of polycyclic aromatic hydrocarbons from cooking oil using ultra-thin layer chromatography and surface enhanced Raman spectroscopy
Source: Royal Society of Chemistry journal article supplement (doi:10.1039/c4tb01632g), 2015-01-01
Supplement: c4tb01632g1.pdf [file c4tb01632g1.pdf]

# Detection of Polycyclic Aromatic Hydrocarbons from Cooking Oil Using Ultra-Thin Layer Chromatography and Surface Enhanced Raman Spectroscopy

## Supplementary Information

Jing Chen<sup>1,3</sup>, Yao-wen Huang<sup>1,3</sup>, and Yiping Zhao<sup>2,3</sup>

1 Department of Food Science and Technology, University of Georgia, Athens, GA 30602, USA

2 Department of Physics and Astronomy, University of Georgia, Athens, GA 30602, USA

3 Nanoscale Science and Engineering Center, University of Georgia, Athens, GA 30602, USA.

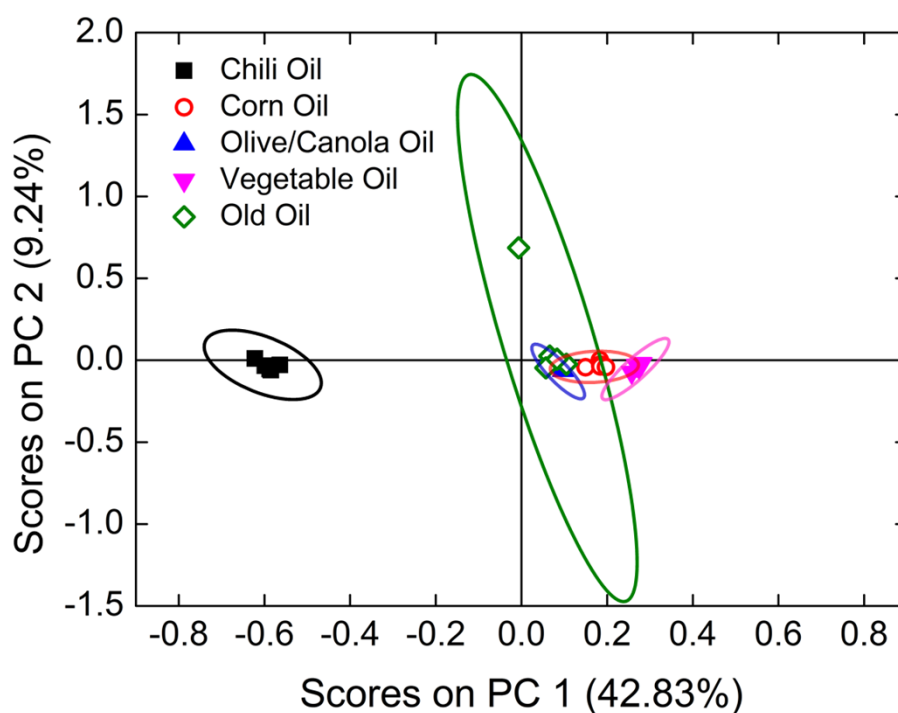

**Figure S1** Principle component analysis of the Raman spectra of oil. Chili oil is grouped as a separate cluster whereas all other oil samples are grouped as one cluster.

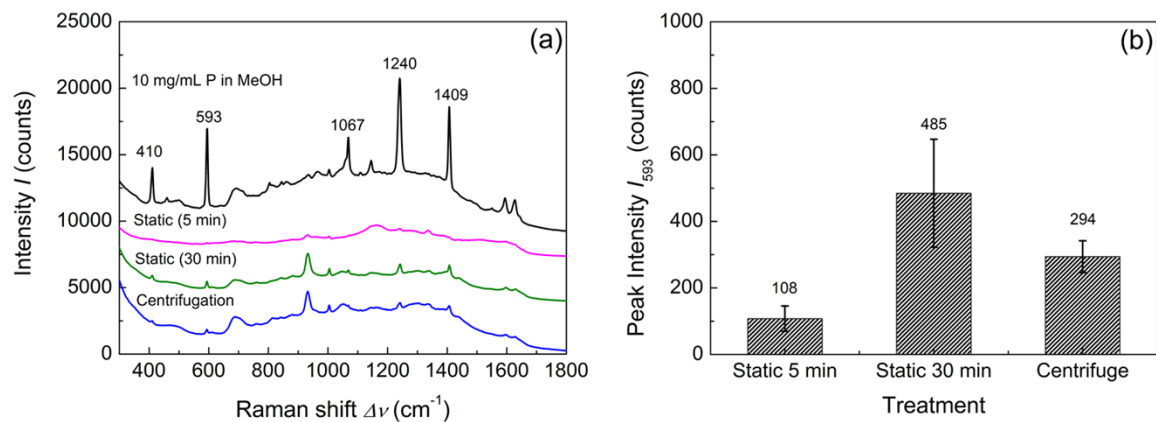

**Figure S2** Effect of partitioning conditions on the SERS intensity of extracted P. (a) SERS spectra of P in methanol solution and after extraction from oil and settling under different conditions: static settling for 5 and 30 min, and centrifugation for 1 min at 3000 rpm (b)

Comparison of corresponding  $I_{593}$ .

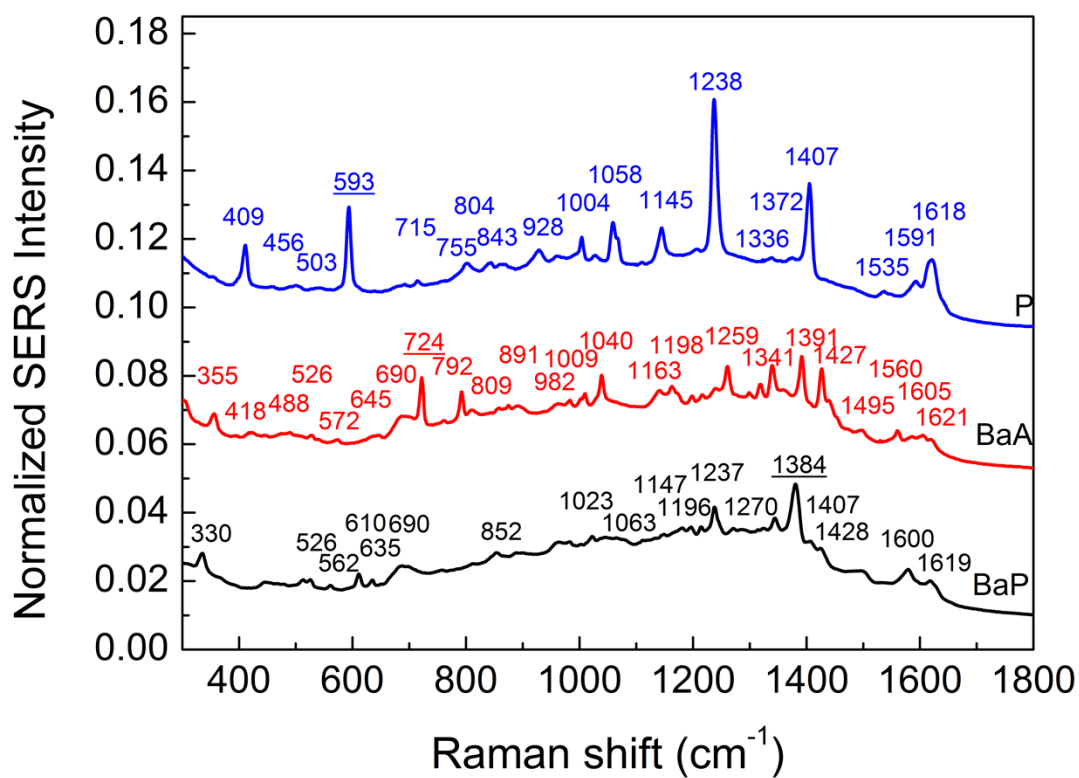

**Figure S3** SERS spectra of BaA, BaP, and P in methanol solution (200  $\mu\text{g/mL}$ ). The peaks at  $\Delta\nu = 724$ , 1384, and 593  $\text{cm}^{-1}$  were selected to specifically indicate the presence of BaA, BaP, and P in this study. The spectra were normalized to the norm.

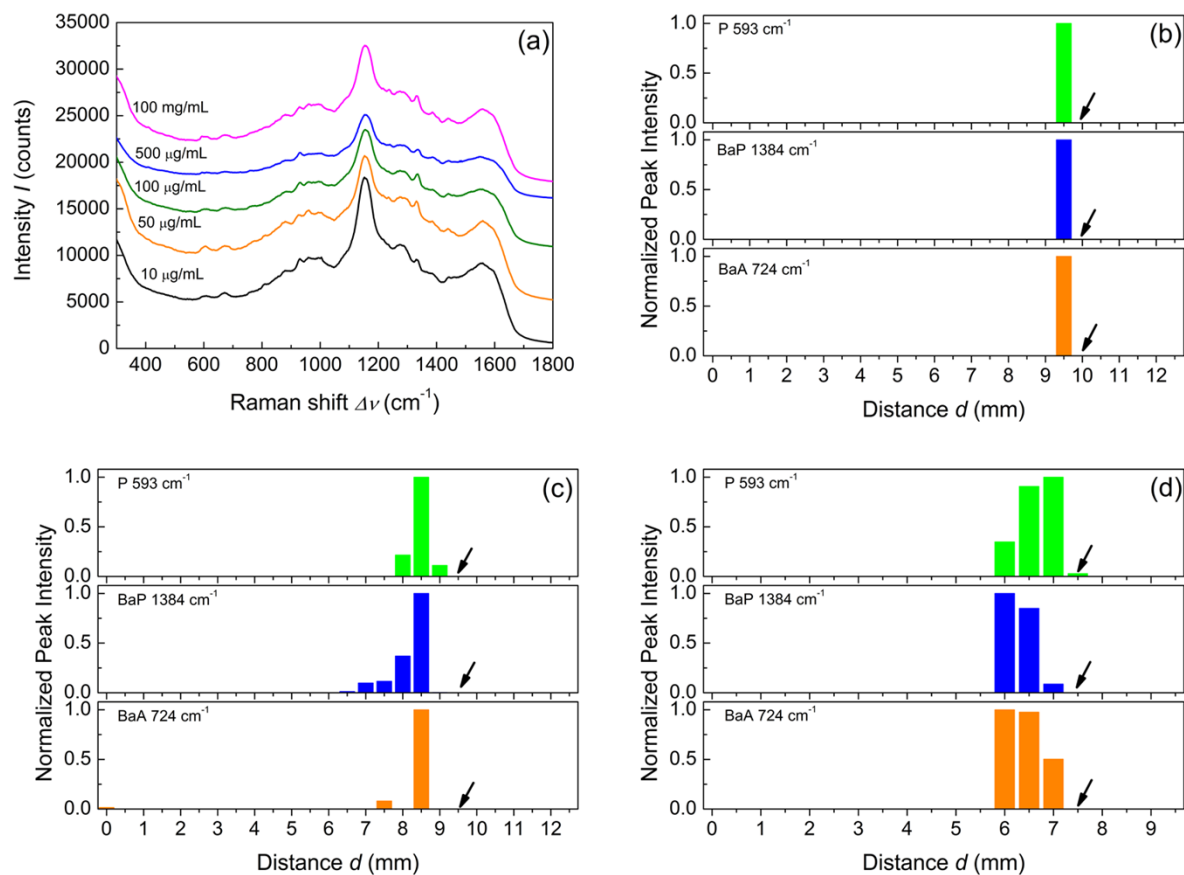

**Figure S4** UTLC-SERS detection of PAHs 20% of water in methanol solution on unmodified substrates. (a) SERS spectra of PAH extracts from vegetable oil before UTLC, and corresponding chromatograms of (b) 100  $\mu\text{g/mL}$ , (c) 500  $\mu\text{g/mL}$ , and (d) 1  $\text{mg/mL}$  of PAH mixtures extracted from vegetable oil

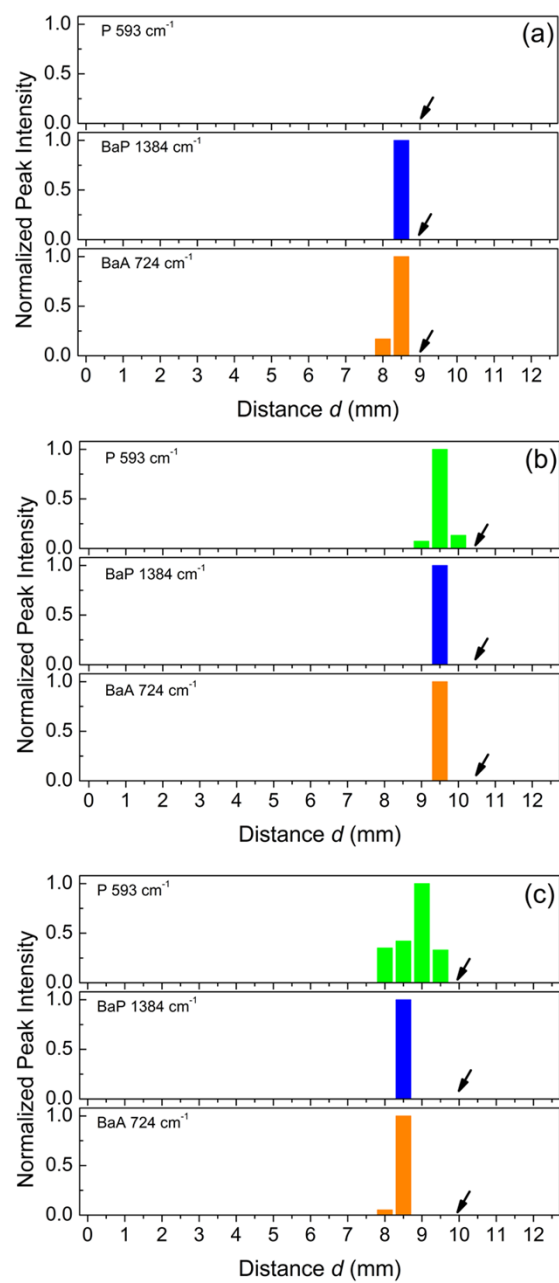

**Figure S5** UTLC-SERS detection of (a) 100 µg/mL, (b) 500 µg/mL, and (c) 1 mg/mL of PAHs extracted from vegetable oil using methanol on ME modified substrates
